# Supplementary material for: Identification of Five Serotypes of Enteropathogenic Escherichia coli from Diarrheic Calves and Healthy Cattle in Belgium and Comparative Genomics with Shigatoxigenic E. coli
Source: MDPI journal article supplement (doi:10.3390/vetsci9090492), 2022-09-10
Supplement: s1 [file s1]

**Table S1a.** Serotypes, MLST and *eae* gene subtypes of the O156 EPEC and AE-STE C from diarrheic calves, healthy cattle, healthy calves and humans.

| Isolate (year)           | Host <sup>a</sup> | O:H serotype | MLST   | <i>eae</i> , <i>stx</i> subtypes    | GenBank accession numbers |
|--------------------------|-------------------|--------------|--------|-------------------------------------|---------------------------|
| 847 (2014)               | HC                | O156:H8      | ST327  | <i>eae</i> <u>θ</u>                 | SAMN14278591              |
| 1287 (2014) <sup>b</sup> | HC                | O156:H8      | ST327  | <i>eae</i> <u>θ</u>                 | SAMN14278592              |
| 1296 (2014) <sup>b</sup> | HC                | O156:H8      | ST327  | <i>eae</i> <u>θ</u>                 | SAMN14278593              |
| 1718 (2014)              | HC                | O156:H25     | ST300  | <i>eae</i> <u>ζ</u>                 | SAMN14278594              |
| 1728 (2014) <sup>c</sup> | HC                | O156:H25     | ST300  | <i>eae</i> <u>ζ</u>                 | SAMN14278595              |
| 1745 (2014) <sup>c</sup> | HC                | O156:H25     | ST300  | <i>eae</i> <u>ζ</u>                 | SAMN14278596              |
| 1759 (2014) <sup>c</sup> | HC                | O156:H25     | ST300  | <i>eae</i> <u>ζ</u>                 | SAMN14278597              |
| 1842 (2014)              | HC                | O156:H25     | ST300  | <i>eae</i> <u>ζ</u>                 | SAMN14278598              |
| 1882 (2014)              | HC                | O156:H25     | ST300  | <i>eae</i> <u>ζ</u>                 | SAMN14278599              |
| 2830 (2014) <sup>d</sup> | HC                | O156:H25     | ST300  | <i>eae</i> <u>ζ</u>                 | SAMN14278600              |
| 2834 (2014) <sup>d</sup> | HC                | O156:H25     | ST300  | <i>eae</i> <u>ζ</u>                 | SAMN14278601              |
| 2837 (2014) <sup>d</sup> | HC                | O156:H25     | ST300  | <i>eae</i> <u>ζ</u>                 | SAMN14278602              |
| 2839 (2014) <sup>d</sup> | HC                | O156:H25     | ST300  | <i>eae</i> <u>ζ</u>                 | SAMN14278603              |
| 1750 (2014) <sup>c</sup> | HC                | O156:H25     | ST300  | <i>eae</i> <u>ζ</u> , <i>stx</i> 2g | SAMN14278604              |
| EH2269 (2013)            | HU                | O156:H25     | ST4942 | <i>eae</i> <u>ζ</u> , <i>stx</i> 1a | SAMN14278609              |

<sup>a</sup>DC = diarrheic calf; HC = healthy cattle; HU = human

<sup>b</sup>these 2 EPEC were isolated from a single animal

<sup>c</sup>these 3 EPEC and the AE-STE C were isolated from a single animal

<sup>d</sup>these 4 EPEC were isolated from a single animal

**Table S1b.** Serotypes, MLST and *eae* gene subtypes of the O177 EPEC and AE-STE C from diarrheic calves, healthy cattle, healthy calves and humans

| Isolate (year)           | Host <sup>a</sup> | O:H serotype | MLST  | <i>eae</i> , <i>stx</i> subtypes    | GenBank accession numbers |
|--------------------------|-------------------|--------------|-------|-------------------------------------|---------------------------|
| 199 (2013)               | DC                | O177:H11     | ST29  | <i>eae</i> <u>β</u>                 | SAMN14278583              |
| 231 (2014)               | DC                | O177:H25     | ST342 | <i>eae</i> <u>β</u>                 | SAMN14278582              |
| 12 (2008)                | DC                | O177:H11     | ST765 | <i>eae</i> <u>β</u>                 | SAMN14278574              |
| 29 (2009)                | DC                | O177:H11     | ST765 | <i>eae</i> <u>β</u>                 | SAMN14278575              |
| 38 (2009)                | DC                | O177:H11     | ST765 | <i>eae</i> <u>β</u>                 | SAMN14278576              |
| 42 (2009)                | DC                | O177:H11     | ST765 | <i>eae</i> <u>β</u>                 | SAMN14278577              |
| 45 (2009)                | DC                | O177:H11     | ST765 | <i>eae</i> <u>β</u>                 | SAMN14278578              |
| 46 (2009)                | DC                | O177:H11     | ST765 | <i>eae</i> <u>β</u>                 | SAMN14278579              |
| 53 (2009)                | DC                | O177:H11     | ST765 | <i>eae</i> <u>β</u>                 | SAMN14278580              |
| 3016 (2015)              | DC                | O177:H11     | ST765 | <i>eae</i> <u>β</u>                 | SAMN14278583              |
| 2113 (2014)              | HC                | O177:H11     | ST765 | <i>eae</i> <u>β</u>                 | SAMN14278590              |
| 380 (2018) <sup>b</sup>  | HCS               | O177:H11     | ST765 | <i>eae</i> <u>β</u>                 | SAMN29328416              |
| 384 (2018) <sup>b</sup>  | HCS               | O177:H11     | ST765 | <i>eae</i> <u>β</u>                 | SAMN29328417              |
| 1396 (2018) <sup>c</sup> | HCS               | O177:H11     | ST765 | <i>eae</i> <u>β</u>                 | SAMN29328418              |
| 1400 (2018) <sup>c</sup> | HCS               | O177:H11     | ST765 | <i>eae</i> <u>β</u>                 | SAMN29328419              |
| 191 (2013)               | DC                | O177:H25     | ST342 | <i>eae</i> <u>β</u> , <i>stx</i> 2c | SAMN14278584              |
| SES2949 (2009)           | DC                | O177:H11     | ST765 | <i>eae</i> <u>β</u> , <i>stx</i> 1a | SAMN29328420              |

|                |    |          |       |                    |              |
|----------------|----|----------|-------|--------------------|--------------|
| SES3075 (2013) | DC | O177:H11 | ST765 | <i>eaeβ, stx1a</i> | SAMN29328421 |
| EH1636 (2008)  | HU | O177:H11 | ST29  | <i>eaeβ, stx1a</i> | SAMN14278608 |

<sup>a</sup>DC = diarrheic calf; HC = healthy cattle; HU = human; HCS: healthy calves

<sup>b</sup>these 2 EPEC were isolated from a single animal

<sup>c</sup>these 2 EPEC were isolated from a single animal

**Table S1c.** Serotypes, MLST and *eae* gene subtypes of the O182 EPEC and AE-STE<sub>C</sub> from diarrheic calves, healthy cattle, healthy calves and humans

| Isolate (year)          | Host <sup>a</sup> | O:H serotype | MLST  | <i>eae, stx</i> subtypes | GenBank accession numbers |
|-------------------------|-------------------|--------------|-------|--------------------------|---------------------------|
| 44 (2009)               | DC                | O182:H25     | ST300 | <i>eaeζ</i>              | SAMN14278587              |
| 3035 (2014)             | DC                | O182:H25     | ST300 | <i>eaeζ</i>              | SAMN14278587              |
| 1036 (2014)             | HC                | O182:H25     | ST300 | <i>eaeζ</i>              | SAMN14278605              |
| 2159 (2014)             | HC                | O182:H25     | ST300 | <i>eaeζ</i>              | SAMN14278606              |
| 832 (2018) <sup>b</sup> | HCS               | O182:H25     | ST300 | <i>eaeζ</i>              | SAMN29328414              |
| 836 (2018) <sup>b</sup> | HCS               | O182:H25     | ST300 | <i>eaeζ</i>              | SAMN29328415              |
| 142 (2012)              | DC                | O182:H25     | ST300 | <i>eaeζ, stx1a</i>       | SAMN14278588              |
| 3010 (2014)             | DC                | O182:H25     | ST300 | <i>eaeζ, stx1a</i>       | SAMN14278589              |
| EH1782 (2009)           | HU                | O182:H25     | ST300 | <i>eaeζ, stx1a</i>       | SAMN14278610              |
| EH2247 (2013)           | HU                | O182:H25     | ST300 | <i>eaeζ, stx1a</i>       | SAMN14278607              |

<sup>a</sup>DC = diarrheic calf; HC = healthy cattle; HU = human; HCS: healthy calves

<sup>b</sup>these 2 EPEC were isolated from a single animal

**Table S2:** Sequences included in the databases to identify *eae* subtypes

| Gene                                 | Accession number | Description              |
|--------------------------------------|------------------|--------------------------|
| <i>eae</i> subtype $\alpha$          | AF022236.1       | Intimin subtype, adhesin |
| <i>eae</i> subtype $\alpha$          | AF530555.1       | Intimin subtype, adhesin |
| <i>eae</i> subtype $\beta$           | AF453441.1       | Intimin subtype, adhesin |
| <i>eae</i> subtype $\beta$           | AF043226.1       | Intimin subtype, adhesin |
| <i>eae</i> subtype $\Upsilon$        | AF071034.1       | Intimin subtype, adhesin |
| <i>eae</i> subtype $\Upsilon/\theta$ | AF025311.1       | Intimin subtype, adhesin |
| <i>eae</i> subtype $\delta/\kappa$   | U66102.1         | Intimin subtype, adhesin |
| <i>eae</i> subtype $\epsilon$        | AF116899.1       | Intimin subtype, adhesin |
| <i>eae</i> subtype $\zeta$           | AF449417.1       | Intimin subtype, adhesin |
| <i>eae</i> subtype $\eta$            | AJ308550.1       | Intimin subtype, adhesin |
| <i>eae</i> subtype $\iota$           | AJ308551.1       | Intimin subtype, adhesin |
| <i>eae</i> subtype $\lambda$         | AF530557.1       | Intimin subtype, adhesin |
| <i>eae</i> subtype $\mu$             | AJ579305.1       | Intimin subtype, adhesin |
| <i>eae</i> subtype $\nu$             | AJ579306.1       | Intimin subtype, adhesin |
| <i>eae</i> subtype $\xi$             | AJ705051.1       | Intimin subtype, adhesin |

**Table S3a.** O serotypes of 126 EPEC isolated from calves with diarrhea

| O Serotype | Nr. Isolates EPEC (n=307) (%) | Reference  |
|------------|-------------------------------|------------|
| O5         | 0                             | 4, 5, 16   |
| O26        | 35 (11%)                      | This study |
| O80        | 54 (18%)                      |            |
| O103       | 1 (<1%)                       |            |
| O111       | 0                             |            |
| O118       | 0                             |            |
| O121       | 2 (<1%)                       |            |
| O145       | 1 (<1%)                       |            |
| O157       | 0                             |            |
| O165       | 0                             |            |
| O123/186   | 10 (3%)                       |            |
| O156       | 0                             | This study |
| O177       | 21 (7%)                       |            |
| O182       | 2 (<1%)                       |            |
| O183       | 0                             |            |
| Total      | 126 (41%)                     |            |

**Table S3b.** O serotypes of 122 EPEC isolated from healthy cattle at slaughterhouse

| O Serotype | Nr. Isolates EPEC (n=368) (%) | Nr. Animals (= 47) | Reference  |
|------------|-------------------------------|--------------------|------------|
| O5         | 0                             | 0                  | 7          |
| O26        | 2 (<1%)                       | 2                  | This study |
| O80        | 0                             | 0                  |            |
| O103       | 38 (12%)                      | 7                  |            |
| O111       | 0                             | 0                  |            |
| O118       | 0                             | 0                  |            |
| O121       | 0                             | 0                  |            |
| O145       | 0                             | 0                  |            |
| O157       | 0                             | 0                  |            |
| O165       | 0                             | 0                  |            |
| O123/186   | 0                             | 0                  |            |
| O156       | 67 (22%)                      | 9                  |            |
| O177       | 5 (2%)                        | 1                  |            |
| O182       | 10 (3%)                       | 3                  |            |
| O183       | 0                             | 0                  |            |
| Total      | 122 (40%)                     | 22                 |            |

**Table S3c.** O serotypes of 60 EPEC isolated from healthy calves in dairy farms

| O Serotype | Nr. Isolates (n=131) (%) | Nr. Animals (= 36) | Reference |
|------------|--------------------------|--------------------|-----------|
| O5         | 0                        | 0                  | 8         |
| O26        | 4 (3%)                   | 3                  |           |
| O80        | 0                        | 0                  |           |
| O103       | 4 (3%)                   | 2                  |           |
| O111       | 5 (4%)                   | 4                  |           |
| O118       | 0                        | 0                  |           |
| O121       | 0                        | 0                  |           |
| O145       | 21 (16%)                 | 9                  |           |
| O157       | 4 (3%)                   | 1                  |           |
| O165       | 0                        | 0                  |           |
| O123/186   | 2 (2%)                   | 1                  |           |
| O156       | 0                        | 0                  |           |
| O177       | 17 (13%)                 | 4                  |           |
| O182       | 3 (2%)                   | 1                  |           |
| O183       | 0                        | 0                  |           |
| Total      | 60 (46%)                 | 25                 |           |
